# Supplementary material
Source: PubMed Central journal article supplement (PMC5800304)
Supplement: NIHMS938241-supplement-1.pdf [file NIHMS938241-supplement-1.pdf]

Supplementary Information

| Material                 | Example Cell Culture Studies and Experimental Outcomes                                                                                                                                                                                                                                               | Specific Recipes and Properties of Hydrogel Used                                                                                                                                                                                                                                                                                       |
|--------------------------|------------------------------------------------------------------------------------------------------------------------------------------------------------------------------------------------------------------------------------------------------------------------------------------------------|----------------------------------------------------------------------------------------------------------------------------------------------------------------------------------------------------------------------------------------------------------------------------------------------------------------------------------------|
| <b>Natural Materials</b> |                                                                                                                                                                                                                                                                                                      |                                                                                                                                                                                                                                                                                                                                        |
| Collagen                 | Mouse fibroblasts were shown to invade into collagen hydrogels in an MT1-MMP-dependent manner <sup>1</sup>                                                                                                                                                                                           | 2.2 mg ml <sup>-1</sup> rat or mice tail type I collagen hydrogel; Hydrogels were formed at 37°C for 45 min in bottom chamber of Transwell setup while cells were seeded in upper chamber (pore size 3 μm) <sup>1</sup>                                                                                                                |
|                          | MSCs cultured in collagen hydrogels require dynamic loading for maintaining tenogenic markers and suggest a role for Wnt in tenogenesis similar to chondrogenesis <sup>2</sup>                                                                                                                       | 2.4 mg ml <sup>-1</sup> type I collagen hydrogel in PBS at pH 7.4 (Vitrogen, Cohesion Inc); MSCs encapsulated at 2 x 10 <sup>6</sup> cells ml <sup>-1</sup> ; Hydrogels formed via self-assembly for 1-2 h at 37°C <sup>2</sup>                                                                                                        |
|                          | 3T3 fibroblasts cultured on soft (G ~ 100-400 Pa) collagen hydrogels show robust spreading and focal adhesion formation without YAP nuclear localization, perhaps highlighting the importance of fibrous architecture and substrate viscoelasticity in cell mechanotransduction studies <sup>3</sup> | 2 and 4 mg ml <sup>-1</sup> rat tail type I collagen hydrogel in PBS at pH 7.3 (BD Biosciences); Hydrogels formed via self-assembly in 35 mm glass bottom dishes for 90 min at 37°C; Cells seeded on top of hydrogels; Hydrogel shear moduli were 104 and 391 Pa for 2 and 4 mg ml <sup>-1</sup> formulation respectively <sup>3</sup> |
|                          | HT-1080 fibrosarcoma and MDA-MB-231 carcinoma cells cultured in 3D collagen matrices showed protease-independent mechanisms of migration/invasion by transitioning from a mesenchymal to amoeboid morphology <sup>4</sup>                                                                            | 1.67 mg ml <sup>-1</sup> dermal bovine type I collagen hydrogels (Vitrogen, Cohesion Inc) <sup>4</sup>                                                                                                                                                                                                                                 |
| Fibrin                   | Embryonic chick tendon fibroblasts were seeded on fibrin Hydrogels anchored into well plates to form contraction-mediated collagenous microtissues <sup>5</sup>                                                                                                                                      | 5.7 mg ml <sup>-1</sup> fibrinogen (Sigma), 35.7 U ml <sup>-1</sup> thrombin (Calbiochem), and 14.3 μg ml <sup>-1</sup> aprotinin (Roche) were combined in cell culture media; Gelation occurred at                                                                                                                                    |

|                            |                                                                                                                                                                                                                                                                              |                                                                                                                                                                                                                                                                                                                                                                                                                              |
|----------------------------|------------------------------------------------------------------------------------------------------------------------------------------------------------------------------------------------------------------------------------------------------------------------------|------------------------------------------------------------------------------------------------------------------------------------------------------------------------------------------------------------------------------------------------------------------------------------------------------------------------------------------------------------------------------------------------------------------------------|
|                            |                                                                                                                                                                                                                                                                              | 37°C for 1 h; Embryonic chick tendon fibroblasts were cultured on top of hydrogels <sup>5</sup>                                                                                                                                                                                                                                                                                                                              |
|                            | Increased pore elongation in fibrin constructs resulted in improved myofibroblast formation and alignment, leading to increased total contractile force <sup>6</sup>                                                                                                         | 4 mg ml <sup>-1</sup> bovine fibrinogen (Sigma), 0.8 U ml <sup>-1</sup> thrombin (Sigma), and 10% v/v Matrigel in PDMS mold; 10 million rat neonatal rat skeletal myoblasts per ml were encapsulated; Gelation was for 45-60 min at 37°C <sup>6</sup>                                                                                                                                                                        |
| Alginate                   | Mouse MSCs were shown to sense 3D substrate stiffness with osteogenesis preferentially occurring at higher (11-30 kPa) stiffnesses; this finding was not dependent on cell shape but instead on traction-mediated nanoscale re-organization of adhesion ligands <sup>7</sup> | 1-5 wt% alginate (FMC Biopolymer) with 6.25-50 mM calcium content yielded hydrogels with mechanics ranging from 2.5-110 kPa; Hydrogels were covalently modified with either 189 or 754 μM RGD; Mouse MSCs (D1) were encapsulated at 2 x 10 <sup>7</sup> cells ml <sup>-1</sup> <sup>7</sup>                                                                                                                                  |
|                            | 3T3 fibroblasts showed increased spreading and YAP nuclear localization when cultured on stress relaxing hydrogels mimicking tissue viscoelasticity compared to stiffness-matched elastic substrates <sup>8</sup>                                                            | 1 wt% guluronic acid-rich high molecular weight (280 kDa) alginate (FMC Biopolymer) was used with RGD peptide conjugated via carbodiimide chemistry at either 150, 750, or 1500 μM; Hydrogels were either ionically crosslinked with calcium sulfate or covalently crosslinked using carbodiimide chemistry; Cells were seeded at a density of 1 x 10 <sup>4</sup> cells cm <sup>-2</sup> and cultured for 20 h <sup>8</sup> |
| <b>Synthetic Materials</b> |                                                                                                                                                                                                                                                                              |                                                                                                                                                                                                                                                                                                                                                                                                                              |
| Polyacrylamide (PA)        | Rat kidney epithelial cells and 3T3 fibroblasts were cultured on collagen-coated polyacrylamide                                                                                                                                                                              | 10% acrylamide and bis-acrylamide ranging from 0.03 to 0.26%; Increased bis-                                                                                                                                                                                                                                                                                                                                                 |

|  |                                                                                                                                                                                                                                                                                                                                |                                                                                                                                                                                                                                                                                                                                                                                                                                                                                                |
|--|--------------------------------------------------------------------------------------------------------------------------------------------------------------------------------------------------------------------------------------------------------------------------------------------------------------------------------|------------------------------------------------------------------------------------------------------------------------------------------------------------------------------------------------------------------------------------------------------------------------------------------------------------------------------------------------------------------------------------------------------------------------------------------------------------------------------------------------|
|  | <p>substrates of varying stiffness; Cells on softer substrates showed reduced spreading, increased motility, and irregularly shaped focal adhesions compared to cells on stiffer substrates<sup>9</sup></p>                                                                                                                    | <p>acrylamide corresponds to increased elastic modulus; Hydrogels were coated with type I collagen (0.2 mg ml<sup>-1</sup>) using sulfo-SANPAH chemistry<sup>9</sup></p>                                                                                                                                                                                                                                                                                                                       |
|  | <p>Lineage commitment of naïve human MSCs was shown to be heavily influenced by substrate stiffness alone, with MSCs displaying neurogenic, myogenic, and osteogenic phenotypes on soft (0.1-1 kPa), stiff (8-17 kPa), and rigid (25-40 kPa) polyacrylamide substrates respectively<sup>10</sup></p>                           | <p>5 or 10% acrylamide and bis-acrylamide ranging from 0.03-0.3%; 5% acrylamide hydrogel elastic modulus ranged from ~ 1 kPa (0.03% bis-acrylamide) to ~ 8 kPa (0.3%); Hydrogels were coated with type I collagen (0.25-1 µg cm<sup>-2</sup>) using sulfo-SANPAH chemistry<sup>10</sup></p>                                                                                                                                                                                                    |
|  | <p>The stiffness of 2D cell culture substrates was shown to regulate human ASC and MSC fate independent of hydrogel pore size and protein tethering<sup>11</sup></p>                                                                                                                                                           | <p>A range of acrylamide/bis-acrylamide percentages were used depending on hydrogel elastic modulus: 4 kPa (4/0.40, 6/0.06, 10/0.02), 13 kPa (6/0.45, 10/0.10, 20/0.03), and 30 kPa (8/0.55, 10/0.30, 20/0.18); Higher acrylamide/bis-acrylamide ratios for a given stiffness resulted in larger pore size; Human ASCs or MSCs were seeded at 1000 cells cm<sup>-2</sup>; Hydrogels were coated with type I collagen (0.02-1 mg ml<sup>-1</sup>) using sulfo-SANPAH chemistry<sup>11</sup></p> |
|  | <p>Human MSCs were cultured on hydrogels with constant compressive modulus but varying loss modulus; MSCs on substrates with more viscoelastic character (higher loss modulus) had greater spread area, less mature focal adhesions, and were capable of more efficient differentiation down various lineages<sup>12</sup></p> | <p>Hydrogels with constant shear modulus (<math>G' \sim 4.5</math> kPa) but varying loss modulus (<math>G''</math>) were synthesized by changing acrylamide/bis-acrylamide percentages; 15/0.0125 (<math>G'' \sim 130</math> Pa), 12/0.0358 (<math>G'' \sim 10</math> Pa), and 8/1 (<math>G'' \sim 1</math> Pa); Human MSCs were seeded at 4000 cells cm<sup>-2</sup>; Hydrogels were coated with type I collagen (50 µg ml<sup>-1</sup>) using sulfo-</p>                                     |

|                           |                                                                                                                                                                                                                                             |                                                                                                                                                                                                                                                                                                                                             |
|---------------------------|---------------------------------------------------------------------------------------------------------------------------------------------------------------------------------------------------------------------------------------------|---------------------------------------------------------------------------------------------------------------------------------------------------------------------------------------------------------------------------------------------------------------------------------------------------------------------------------------------|
|                           |                                                                                                                                                                                                                                             | SANPAH chemistry <sup>12</sup>                                                                                                                                                                                                                                                                                                              |
| Polyethylene glycol (PEG) | PEG hydrogels modified with RGD were used to photoencapsulate osteoblasts; Osteoblasts showed better survival at lower (10%) PEG concentrations and improved attachment, spreading, and mineralization with RGD incorporation <sup>13</sup> | 10-30% PEG-diacrylate modified with 0.5 or 5 mM acrylated RGD; Rat calvarial osteoblasts were photoencapsulated at $50 \times 10^6$ cells ml <sup>-1</sup> with UV light at $\sim 4$ mW cm <sup>-2</sup> for 5 min <sup>13</sup>                                                                                                            |
|                           | PEG hydrogels incorporating crosslinkers susceptible to MMP degradation were developed; Human fibroblasts invaded the hydrogel in an MMP-dependent manner <sup>14</sup>                                                                     | 10% 4 arm-PEG-tetravinyl sulfone (20 kDa) was reacted with cysteine-containing peptides containing RGD or MMP-sensitive sequences; Crosslinking occurs via Michael addition at pH 8 within a few minutes; Fibrin-protected human foreskin fibroblasts were embedded within hydrogels to assess invasion <sup>14</sup>                       |
|                           | PEG-based photodegradable hydrogels were developed to enable spatiotemporal control of hydrogel features to explore cell phenomena including migration and differentiation <sup>15</sup>                                                    | PEG- <i>bis</i> -amine is reacted with nitrobenzyl ether-derived moiety to create photolabile groups; The photolabile crosslinker is reacted with PEG acrylate using APS/TEMED redox to form hydrogels; RGD is incorporated to permit cell attachment; Human MSCs were encapsulated at $2 \times 10^7$ cells ml <sup>-1</sup> <sup>15</sup> |
|                           | Maleimide-functionalized PEG hydrogels are shown to hydrogel more rapidly (1-5 min) compared to other modified PEG hydrogels formed by Michael addition (acrylate, vinyl sulfone); PEG-maleimide hydrogels can be                           | 10% 4-arm-PEG-maleimide (20 kDa) was reacted with cysteine (thiol)-containing RGD and MMP-sensitive sequences; Crosslinking occurs rapidly via Michael addition at pH 7.4; Murine                                                                                                                                                           |

|                         |                                                                                                                                                                                                                                                                                                                                                                                                                         |                                                                                                                                                                                                                                                                                                                                                                                                                                                                                                                                                                       |
|-------------------------|-------------------------------------------------------------------------------------------------------------------------------------------------------------------------------------------------------------------------------------------------------------------------------------------------------------------------------------------------------------------------------------------------------------------------|-----------------------------------------------------------------------------------------------------------------------------------------------------------------------------------------------------------------------------------------------------------------------------------------------------------------------------------------------------------------------------------------------------------------------------------------------------------------------------------------------------------------------------------------------------------------------|
|                         | formed at lower concentrations and facilitate improved cell survival and spreading <sup>16</sup>                                                                                                                                                                                                                                                                                                                        | C2C12 myoblasts were encapsulated at $3 \times 10^6$ cells $\text{ml}^{-1}$ <sup>16</sup>                                                                                                                                                                                                                                                                                                                                                                                                                                                                             |
| <b>Hybrid materials</b> |                                                                                                                                                                                                                                                                                                                                                                                                                         |                                                                                                                                                                                                                                                                                                                                                                                                                                                                                                                                                                       |
| Hyaluronic acid (HA)    | Methacrylated HA planar hydrogels are described that can be stiffened in the presence of cells from $\sim 3$ kPa to $\sim 30$ kPa via sequential crosslinking; Human MSCs spread rapidly and exert greater traction forces in response to stiffening; In mixed osteogenic/adipogenic culture late stiffening time points favor adipogenesis while earlier stiffening preferentially promotes osteogenesis <sup>17</sup> | 3 wt% methacrylated HA (100% modification) crosslinked via Michael addition at pH 10 for 1 h with DTT ( $\sim 18\%$ methacrylate consumption) to yield hydrogel with $E \sim 3$ kPa; Hydrogels incorporated 0.5-2 mM RGD peptide; Hydrogels could be stiffened via photocrosslinking of remaining network methacrylates in presence of photoinitiator (0.05 wt% I2959) and light (UV light 365 nm 2 min at $10 \text{ mW cm}^{-2}$ ) to $E \sim 30$ kPa <sup>17</sup>                                                                                                 |
|                         | Degradation-mediated traction force generation directs human MSC differentiation in covalently crosslinked HA hydrogels; Restrictive hydrogels promote adipogenesis regardless of hydrogel modulus while hydrogels permissive to cell-mediated degradation promote traction force generation and osteogenesis <sup>18</sup>                                                                                             | 1.5-2.5 wt% HA hydrogels modified with methacrylates (or both methacrylates and maleimides) were fabricated; Methacrylated HA was formed by UV crosslinking (0.05 wt% I2959, $10 \text{ mW cm}^{-2}$ ); Methacrylate/Maleimide HA hydrogels were formed by an initial addition reaction with MMP-sensitive peptides consuming the maleimides followed by photocrosslinking of hydrogel methacrylates at same conditions as above; Human MSCs were encapsulated at 15 million cells $\text{ml}^{-1}$ (MeHA) or 1 million cells $\text{ml}^{-1}$ (MeMaHA) <sup>18</sup> |
| Polypeptides            | A self-assembled peptide hydrogel was developed for                                                                                                                                                                                                                                                                                                                                                                     | 0.5 wt% KLD12 peptide (AcN-KLDLKLKLDL-CNH <sub>2</sub> ) in                                                                                                                                                                                                                                                                                                                                                                                                                                                                                                           |

|  |                                                                                                                                                                                                                                             |                                                                                                                                                                                                                                    |
|--|---------------------------------------------------------------------------------------------------------------------------------------------------------------------------------------------------------------------------------------------|------------------------------------------------------------------------------------------------------------------------------------------------------------------------------------------------------------------------------------|
|  | cartilage tissue engineering; chondrocytes were encapsulated for 4 weeks <i>in vitro</i> and showed phenotypic maintenance, deposition of cartilage-like ECM, and increasing stiffness over culture time <sup>19</sup>                      | 295 mM sucrose; Bovine chondrocytes were encapsulated at $15 \times 10^6$ cells $\text{ml}^{-1}$ ; Hydrogel was self-assembled in PBS bath for 25 min <sup>19</sup>                                                                |
|  | 3D peptide hydrogels encapsulating mouse ESCs or iPSCs supported improved generation of dopaminergic neurons compared to 2D substrates or 3D Matrigel cultures <sup>20</sup>                                                                | Mouse ESCs or iPSCs were mixed with RADA16 peptide (PuraMatrix, BD Biosciences) to form hydrogels; Cells were encapsulated at $5 \times 10^7$ cells $\text{ml}^{-1}$ <sup>20</sup>                                                 |
|  | VEGF-mimetic peptide amphiphile was designed to self-assemble into nanofibrils that displayed the VEGF-mimetic sequence on their surface; This peptide promoted phosphorylation of VEGF receptors and proangiogenic responses <sup>21</sup> | VEGF-mimetic presenting peptide $\text{C}_{16}\text{-V}_2\text{A}_2\text{K}_3\text{-GKLTWQELYQLKYKGI-NH}_2$ where the underlined sequence is the VEGF mimetic was synthesized by standard solid phase Fmoc chemistry <sup>21</sup> |

**Supplementary Table 1. Specific examples of cell studies performed with hydrogels with details of hydrogel formation included.**

### Supplementary References

1. Sabeh, F. et al. Tumor cell traffic through the extracellular matrix is controlled by the membrane-anchored collagenase MT1-MMP. *The Journal of Cell Biology* **167**, 769-781 (2004).
2. Kuo, C.K. & Tuan, R.S. Mechanoactive tenogenic differentiation of human mesenchymal stem cells. *Tissue Eng Part A* **14**, 1615-1627 (2008).
3. Ali, M.Y., Chuang, C.-Y. & Saif, M.T.A. Reprogramming cellular phenotype by soft collagen gels. *Soft Matter* **10**, 8829-8837 (2014).
4. Wolf, K. et al. Compensation mechanism in tumor cell migration: mesenchymal-amoeboid transition after blocking of pericellular proteolysis. *The Journal of Cell Biology* **160**, 267-277 (2003).
5. Paxton, J.Z., Wudebwe, U.N.G., Wang, A., Woods, D. & Grover, L.M. Monitoring Sinew Contraction During Formation of Tissue-Engineered Fibrin-Based Ligament Constructs. *Tissue Engineering Part A* **18**, 1596-1607 (2012).
6. Bian, W., Juhas, M., Pfeiler, T.W. & Bursac, N. Local tissue geometry determines contractile force generation of engineered muscle networks. *Tissue Eng Part A* **18**, 957-967 (2012).
7. Huebsch, N. et al. Harnessing traction-mediated manipulation of the cell/matrix interface to control stem-cell fate. *Nat Mater* **9**, 518-526 (2010).

8. Chaudhuri, O. et al. Substrate stress relaxation regulates cell spreading. *Nat Commun* **6** (2015).
9. Pelham, R.J., Jr. & Wang, Y. Cell locomotion and focal adhesions are regulated by substrate flexibility. *Proc Natl Acad Sci U S A* **94**, 13661-13665 (1997).
10. Engler, A.J., Sen, S., Sweeney, H.L. & Discher, D.E. Matrix elasticity directs stem cell lineage specification. *Cell* **126**, 677-689 (2006).
11. Wen, J.H. et al. Interplay of matrix stiffness and protein tethering in stem cell differentiation. *Nat Mater* **13**, 979-987 (2014).
12. Cameron, A.R., Frith, J.E. & Cooper-White, J.J. The influence of substrate creep on mesenchymal stem cell behaviour and phenotype. *Biomaterials* **32**, 5979-5993 (2011).
13. Burdick, J.A. & Anseth, K.S. Photoencapsulation of osteoblasts in injectable RGD-modified PEG hydrogels for bone tissue engineering. *Biomaterials* **23**, 4315-4323 (2002).
14. Lutolf, M.P. et al. Synthetic matrix metalloproteinase-sensitive hydrogels for the conduction of tissue regeneration: Engineering cell-invasion characteristics. *Proceedings of the National Academy of Sciences* **100**, 5413-5418 (2003).
15. Kloxin, A.M., Kasko, A.M., Salinas, C.N. & Anseth, K.S. Photodegradable hydrogels for dynamic tuning of physical and chemical properties. *Science* **324**, 59-63 (2009).
16. Phelps, E.A. et al. Maleimide Cross-Linked Bioactive PEG Hydrogel Exhibits Improved Reaction Kinetics and Cross-Linking for Cell Encapsulation and In Situ Delivery. *Advanced Materials* **24**, 64-70 (2012).
17. Guvendiren, M. & Burdick, J.A. Stiffening hydrogels to probe short- and long-term cellular responses to dynamic mechanics. *Nat Commun* **3**, 792 (2012).
18. Khetan, S. et al. Degradation-mediated cellular traction directs stem cell fate in covalently crosslinked three-dimensional hydrogels. *Nat Mater* **12**, 458-465 (2013).
19. Kisiday, J. et al. Self-assembling peptide hydrogel fosters chondrocyte extracellular matrix production and cell division: implications for cartilage tissue repair. *Proc Natl Acad Sci U S A* **99**, 9996-10001 (2002).
20. Ni, N. et al. Self-Assembling Peptide Nanofiber Scaffolds Enhance Dopaminergic Differentiation of Mouse Pluripotent Stem Cells in 3-Dimensional Culture. *PLoS ONE* **8**, e84504 (2013).
21. Webber, M.J. et al. Supramolecular nanostructures that mimic VEGF as a strategy for ischemic tissue repair. *Proceedings of the National Academy of Sciences* **108**, 13438-13443 (2011).
